# Supplementary material for: Image Analysis–based Assessment of PD-L1 and Tumor-Associated Immune Cells Density Supports Distinct Intratumoral Microenvironment Groups in Non–small Cell Lung Carcinoma Patients
Source: Oxford University Press journal article supplement (doi:10.1158/1078-0432.ccr-15-2443), 2016-06-02
Supplement: 10780432ccr152443-sup-156302_2_supp_3451371_35n590.docx [file 10780432ccr152443-sup-156302_2_supp_3451371_35n590.docx]

**Supplementary Table 2.** Median TAIC density by mm2 in the intratumoral and peritumoral compartments of lung ADC and SqCC specimens

| Immune Marker | ADC | | *P** | SqCC | | *P** |
| --- | --- | --- | --- | --- | --- | --- |
| Intratumoral | Peritumoral | Intratumoral | Peritumoral |
| CD3 | 1505.80 | 1636.00 | 0.0139 | 1090.00 | 2213.70 | <0.0001 |
| CD4 | 1217.50 | 1425.40 | 0.0026 | 832.00 | 1648.90 | <0.0001 |
| CD8 | 866.40 | 1040.80 | 0.0363 | 693.20 | 1365.60 | <0.0001 |
| CD57 | 377.47 | 475.40 | 0.1224 | 208.00 | 508.00 | <0.0001 |
| Granzyme B | 236.50 | 410.60 | <0.0001 | 254.10 | 486.60 | <0.0001 |
| CD45RO | 846.37 | 1191.80 | <0.0001 | 913.33 | 1725.60 | <0.0001 |
| PD-1 | 521.40 | 951.80 | <0.0001 | 499.63 | 870.90 | <0.0001 |
| FOXP3 | 357.10 | 435.00 | 0.0001 | 335.70 | 591.80 | <0.0001 |
| CD68 | 330.81 | 445.54 | <0.0001 | 201.56 | 428.69 | <0.0001 |

* Kruskal-Wallis test.
