# Supplementary material for: Image Analysis–based Assessment of PD-L1 and Tumor-Associated Immune Cells Density Supports Distinct Intratumoral Microenvironment Groups in Non–small Cell Lung Carcinoma Patients
Source: Oxford University Press journal article supplement (doi:10.1158/1078-0432.ccr-15-2443), 2016-06-02
Supplement: 10780432ccr152443-sup-156302_2_supp_3451372_45n590.docx [file 10780432ccr152443-sup-156302_2_supp_3451372_45n590.docx]

**Supplementary Table 3.** Correlation between immunohistochemical PD-L1 H-score expressionin MCsand TAIC density by mm2 in the intratumoral and peritumoral compartments in lung ADC and SqCC specimens

| Immune Marker | PD-L1 Expression in MCs | | | | |
| --- | --- | --- | --- | --- | --- |
| ADC | | | SqCC | |
| Rho | | *P** | Rho | *P** |
| Intratumoral |  |  | |  |  |
| CD3 | 0.26105 | 0.0015 | | 0.21248 | 0.0273 |
| CD4 | 0.18285 | 0.0272 | | 0.11491 | 0.2408 |
| CD8 | 0.29011 | 0.0004 | | 0.26258 | 0.0060 |
| CD57 | 0.18149 | 0.0284 | | 0.04925 | 0.6144 |
| Granzyme B | 0.44797 | <0.0001 | | 0.24693 | 0.0100 |
| CD45RO | 0.15691 | 0.0586 | | 0.19766 | 0.0433 |
| PD-1 | 0.35348 | <0.0001 | | 0.03453 | 0.72328 |
| FOXP3 | 0.33396 | <0.0001 | | 0.10444 | 0.2821 |
| CD68 | 0.06849 | 0.4114 | | 0.14603 | 0.1316 |
| Peritumoral |  |  | |  |  |
| CD3 | 0.33585 | <0.0001 | | 0.27744 | 0.0074 |
| CD4 | 0.34871 | <0.0001 | | 0.15012 | 0.1580 |
| CD8 | 0.33319 | 0.0001 | | 0.19936 | 0.0568 |
| CD57 | 0.24925 | 0.0044 | | 0.00058 | 0.9960 |
| Granzyme B | 0.42767 | <0.0001 | | 0.10497 | 0.3190 |
| CD45RO | 0.31952 | 0.0002 | | 0.13393 | 0.2108 |
| PD-1 | 0.22093 | 0.0119 | | -0.07957 | 0.4510 |
| FOXP3 | 0.36250 | <0.0001 | | 0.03557 | 0.7364 |
| CD68 | 0.09109 | 0.3046 | | 0.15923 | 0.1295 |

***** Wilcoxon rank-sum test.
