# Supplementary material for: Image Analysis–based Assessment of PD-L1 and Tumor-Associated Immune Cells Density Supports Distinct Intratumoral Microenvironment Groups in Non–small Cell Lung Carcinoma Patients
Source: Oxford University Press journal article supplement (doi:10.1158/1078-0432.ccr-15-2443), 2016-06-02
Supplement: 10780432ccr152443-sup-156302_2_supp_3451373_j5n590.docx [file 10780432ccr152443-sup-156302_2_supp_3451373_j5n590.docx]

**Supplementary Table 4.** Correlation between median PD-L1 H-scorein macrophages and TAIC density by mm2 in the intratumoral and peritumoral compartments in lung ADC and SqCC specimens

| Immune Marker | PD-L1 Expression in Macrophages | | | |
| --- | --- | --- | --- | --- |
| ADC | | SqCC | |
| Rho | *P** | Rho | *P** |
| Intratumoral |  |  |  |  |
| CD3 | 0.03870 | 0.64280 | 0.13587 | 0.1609 |
| CD4 | 0.12722 | 0.12600 | 0.15807 | 0.1056 |
| CD8 | 0.05477 | 0.51140 | 0.16125 | 0.0955 |
| CD57 | 0.16534 | 0.04610 | 0.18860 | 0.0517 |
| Granzyme B | 0.18612 | <0.02450 | 0.13873 | 0.1522 |
| CD45RO | 0.07739 | 0.35320 | -0.10700 | 0.3344 |
| PD-1 | 0.07389 | 0.37550 | 0.19379 | 0.0445 |
| FOXP3 | 0.13901 | 0.09430 | 0.04097 | 0.6738 |
| CD68 | 0.08616 | 0.30110 | 0.17173 | 0.0755 |
| Peritumoral |  |  |  |  |
| CD3 | -0.01303 | 0.88350 | -0.10485 | 0.3199 |
| CD4 | 0.15699 | 0.07560 | 0.09344 | 0.3811 |
| CD8 | 0.00481 | 0.95690 | -0.01243 | 0.9064 |
| CD57 | 0.22859 | 0.00492 | 0.17794 | 0.0915 |
| Granzyme B | 0.15173 | 0.08610 | 0.10222 | 0.3322 |
| CD45RO | 0.06942 | 0.43440 | -0.16392 | 0.1248 |
| PD-1 | 0.11629 | 0.18940 | 0.12927 | 0.2194 |
| FOXP3 | 0.17157 | 0.05190 | -0.11545 | 0.2731 |
| CD68 | 0.07962 | 0.36980 | 0.11572 | 0.2720 |

***** Wilcoxon rank-sum test.
