# Supplementary material for: Image Analysis–based Assessment of PD-L1 and Tumor-Associated Immune Cells Density Supports Distinct Intratumoral Microenvironment Groups in Non–small Cell Lung Carcinoma Patients
Source: Oxford University Press journal article supplement (doi:10.1158/1078-0432.ccr-15-2443), 2016-06-02
Supplement: 10780432ccr152443-sup-156302_2_supp_3451374_v5n590.docx [file 10780432ccr152443-sup-156302_2_supp_3451374_v5n590.docx]

**Supplementary Table 5.** Correlation between median density by mm2 of TAICs expressing immune markers and clinicopathological features in lung ADC specimens

| Immune Marker | | Histological Subtype | | *P** | Tobacco History | | *P** | Smoking Status | | | *P** | Tumor Size | | *P** | EGFR Mutation Status | | *P** |
| --- | --- | --- | --- | --- | --- | --- | --- | --- | --- | --- | --- | --- | --- | --- | --- | --- | --- |
| Solid | Non-solid |  | Yes | No |  | Current | Former | Never |  | ≤3.1 cm | >3.1 cm |  | Mutant | WT |  |
| Intratumoral | |  |  |  |  |  |  |  |  |  |  |  |  |  |  |  |  |
| CD3 |  | 1734.00 | 1352.00 | 0.022 | 1650.58 | 1644.61 | 0.898 | 1639.81 | 1659.50 | 1644.61 | 0.958 | 1741.41 | 1555.73 | 0.061 | 1613.92 | 1647.48 | 0.718 |
| CD4 | 1333.12 | 1243.87 | 0.466 | 1187.40 | 1647.20 | 0.024 | 1218.96 | 1282.04 | 1577.30 | 0.053 | 1335.00 | 970.60 | 0.006 | 1463.20 | 1252.48 | 0.067 |
| CD8 | 1061.00 | 682.00 | 0.001 | 1105.37 | 886.94 | 0.432 | 1147.51 | 1070.45 | 886.94 | 0.598 | 1123.35 | 1032.27 | 0.115 | 1097.77 | 916.13 | 0.981 |
| CD57 | 470.97 | 804.58 | 0.499 | 589.29 | 834.50 | 0.680 | 530.75 | 637.74 | 834.50 | 0.638 | 652.52 | 585.55 | 0.093 | 494.00 | 363.40 | 0.046 |
| Granzyme B | 315.20 | 191.40 | <0.0001 | 261.00 | 170.30 | 0.006 | 282.20 | 257.80 | 170.30 | 0.013 | 310.62 | 354.95 | 0.860 | 221.59 | 347.06 | 0.105 |
| CD45RO |  | 1015.30 | 936.17 | 0.694 | 977.42 | 998.94 | 0.583 | 918.37 | 1026.34 | 998.94 | 0.523 | 1016.96 | 942.60 | 0.171 | 924.60 | 786.40 | 0.048 |
| PD-1 |  | 577.00 | 433.40 | 0.041 | 608.94 | 587.81 | 0.647 | 601.77 | 614.88 | 587.81 | 0.861 | 619.97 | 592.32 | 0.178 | 580.20 | 603.04 | 0.773 |
| FOXP3 | 432.28 | 376.89 | 0.294 | 415.58 | 351.00 | 0.697 | 434.99 | 399.50 | 351.00 | 0.920 | 433.44 | 381.07 | 0.088 | 382.50 | 404.83 | 0.869 |
| CD68 | 399.16 | 345.52 | 0.247 | 369.96 | 413.16 | 0.684 | 374.13 | 366.50 | 413.16 | 0.879 | 390.44 | 359.71 | 0.286 | 431.50 | 367.09 | 0.394 |
| Peritumoral | |  |  |  |  |  |  |  |  |  |  |  |  |  |  |  |  |
| CD3 |  | 1980.90 | 1319.20 | <0.0001 | 2018.95 | 1459.64 | 0.105 | 2131.50 | 1374.70 | 1487.40 | 0.002 | 1487.80 | 1992.20 | 0.041 | 1196.80 | 1859.38 | 0.021 |
| CD4 | 1550.57 | 1325.60 | 0.002 | 1537.13 | 1529.71 | 0.819 | 1691.84 | 1403.05 | 1529.71 | 0.175 | 1429.83 | 1658.43 | 0.081 | 1178.86 | 1581.30 | 0.036 |
| CD8 | 1316.90 | 803.40 | <0.0001 | 1110.00 | 774.60 | 0.023 | 1496.50 | 890.30 | 774.60 | <0.001 | 858.60 | 1281.60 | 0.019 | 955.40 | 1325.29 | 0.063 |
| CD57 | 682.74 | 641.55 | 0.317 | 641.29 | 576.31 | 0.056 | 628.10 | 422.10 | 374.40 | 0.001 | 602.70 | 738.40 | 0.233 | 804.28 | 643.99 | 0.265 |
| Granzyme B | 457.07 | 364.40 | 0.005 | 434.95 | 294.00 | 0.001 | 506.27 | 407.60 | 294.00 | <0.001 | 391.60 | 502.47 | 0.042 | 398.96 | 552.15 | 0.305 |
| CD45RO | 1277.80 | 1049.60 | 0.016 | 1316.78 | 990.64 | 0.129 | 1438.52 | 1211.27 | 990.64 | 0.083 | 1170.91 | 1392.12 | 0.065 | 1288.10 | 1246.67 | 0.293 |
| PD-1 | 1004.60 | 897.80 | 0.033 | 1072.24 | 998.16 | 0.624 | 1085.07 | 830.20 | 966.20 | 0.024 | 919.40 | 1008.90 | 0.032 | 1082.01 | 905.42 | 0.149 |
| FOXP3 | 325.20 | 185.20 | 0.009 | 614.43 | 372.53 | 0.084 | 511.40 | 426.10 | 351.00 | 0.037 | 408.60 | 531.90 | 0.009 | 384.63 | 613.29 | 0.093 |
| CD68 | 533.31 | 459.79 | 0.066 | 517.80 | 406.33 | 0.250 | 587.81 | 457.11 | 406.33 | 0.083 | 486.43 | 522.29 | 0.761 | 519.50 | 507.09 | 0.720 |

Abbreviation: WT, wild-type. *Chi-square test and Fisher exact test.
